# Supplementary material
Source: publisher figshare collection journal article supplement (https://acs.figshare.com/ndownloader/files/4041082)
Supplement: Supplementary file 1 [file 4041082]

# Supporting Information

to

## Restricted Dynamics of a deuterated linker grafted

## on SBA-15 revealed by Deuterium MAS NMR

S. Jayanthi<sup>1†</sup>, M. Werner<sup>2†</sup>, Y. Xu<sup>2</sup>, G. Buntkowsky<sup>2\*</sup> and S. Vega<sup>1\*</sup>

<sup>1</sup>Department of Chemical Physics, Weizmann Institute of Science, Rehovot, Israel – 76100.

<sup>2</sup> Eduard-Zintl-Institut für Anorganische und Physikalische Chemie, Technische Universität Darmstadt,  
Petersenstr. 20, D-64287 Darmstadt, Germany

\* Author for correspondence: [Gerd.Buntkowsky@chemie.tu-darmstadt.de](mailto:Gerd.Buntkowsky@chemie.tu-darmstadt.de), Fax no. +49 6151 16-4347  
[Shimon.Vega@Weizmann.ac.il](mailto:Shimon.Vega@Weizmann.ac.il), Fax no. +972-8-934-4123

# Contents

|                                                                          |   |
|--------------------------------------------------------------------------|---|
| 1. SBA-15 characterization : BET-BJH.....                                | 3 |
| 2. Proton Integrated Intensity (vs) weight loss .....                    | 4 |
| 3. MD corresponds to T <sub>3</sub> , data points shown in (-X, -Y)..... | 5 |
| 4. MD conformation with one hydroxyl: (i) CO---HO .....                  | 6 |
| 5. MD calculation with more accessible hydroxyls: (ii) CO---HO .....     | 7 |
| 6. MD calculation with more accessible hydroxyls: (iii) NH---OH .....    | 8 |
| 7. MD conformation providing static tensors.....                         | 9 |

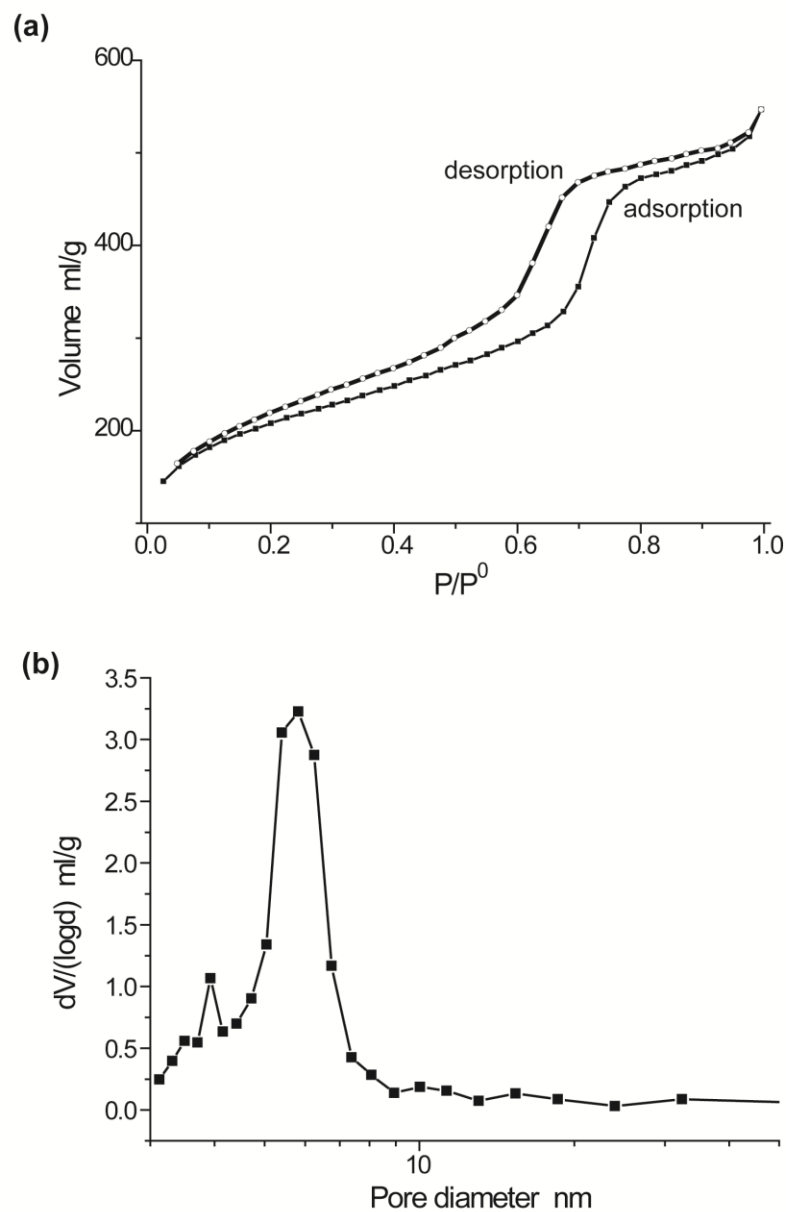

**Figure S1:** (a) BET adsorption – desorption curve of the synthesized SBA-15. Specific surface area observed is  $737 \text{ m}^2/\text{g}$ . (b) shows the BJH curve for the same sample. Average pore diameter and pore volume observed are  $5.8 \text{ nm}$  and  $0.81 \text{ ml/g}$ .

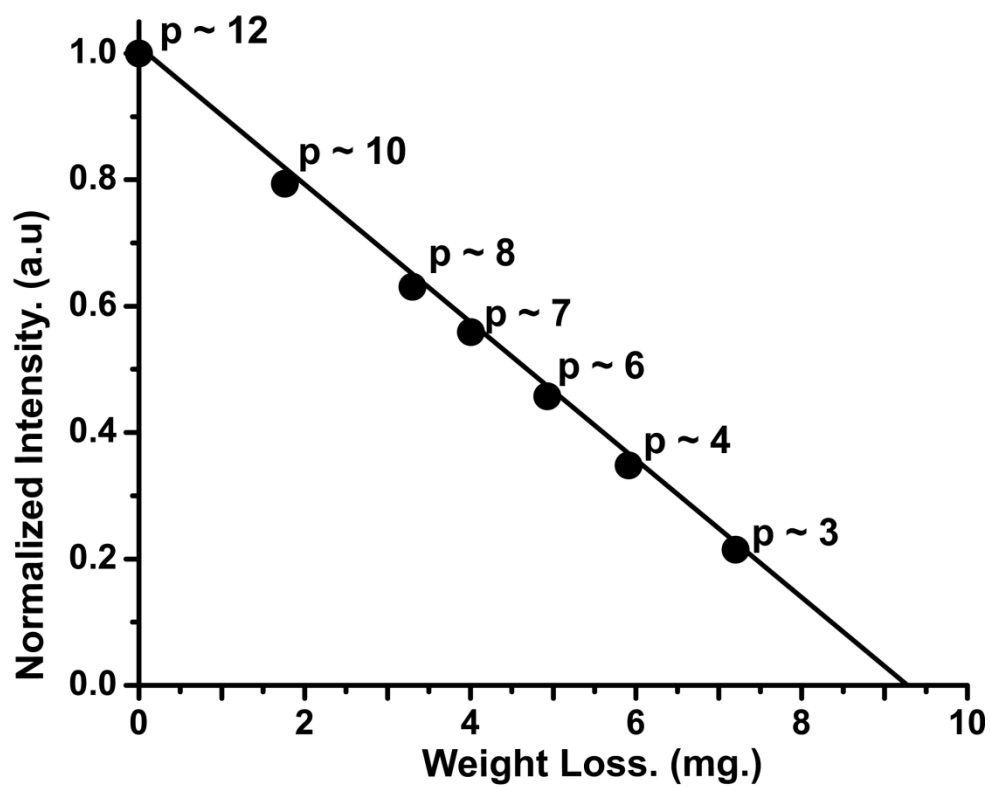

**Figure S2:** Plot shows the linear variation of integrated intensity of the proton spectra with weight loss of the post grafted sample at various levels of pumping.  $p$  values are calculated at each stage and shown therein.

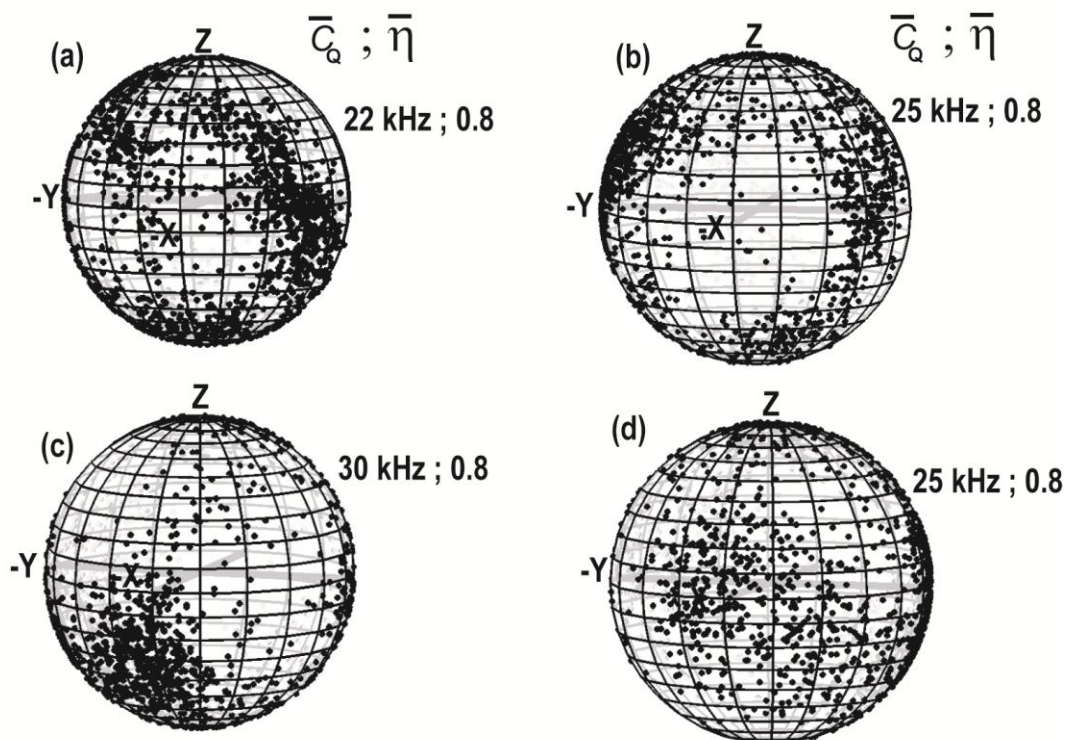

**Figure S3:** Distribution of the trajectory vectors derived from MD representing the spatial variation of  $C_1$ - $D_{1,2}$  and  $C_2$ - $D_{3,4}$  drawn on a unit sphere are shown in (a,b) and (c,d) respectively. Data points correspond to those behind the sphere shown in Figure 7.

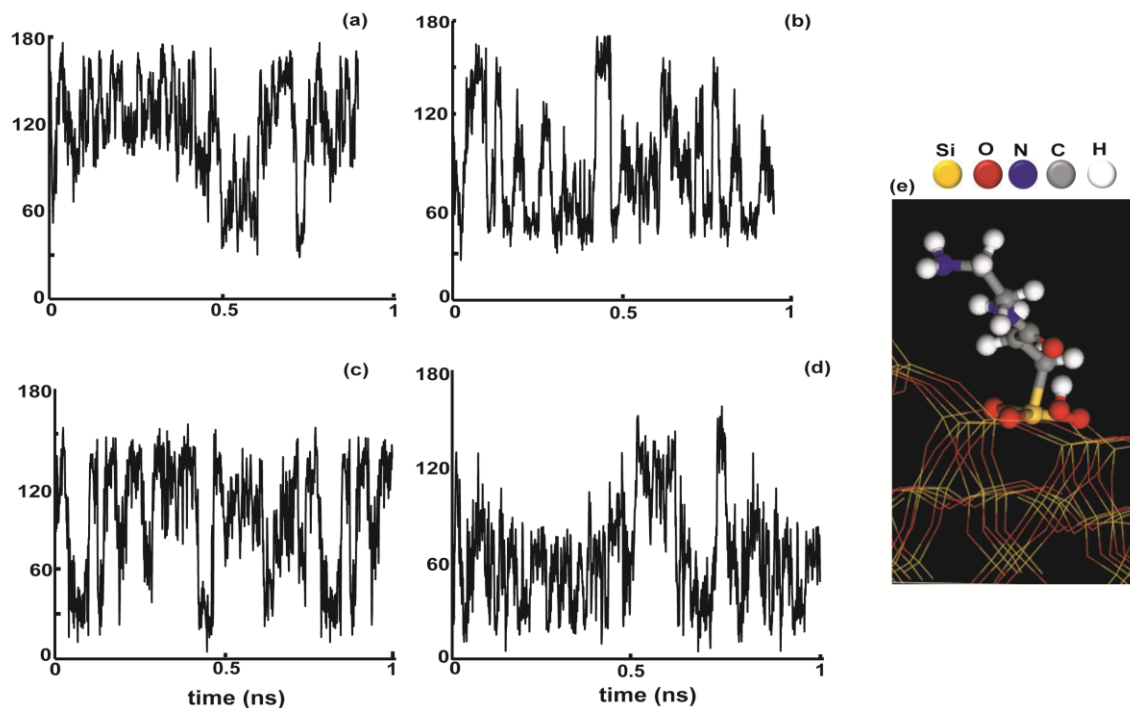

**Figure S4:** Variation of the time dependent polar angle  $\theta$  for  $C_1-D_{1,2}$  and  $C_2-D_{3,4}$  are shown in (a,b) and (c,d) respectively for the model described in Figure 8. The molecular conformation where the mobility of the linker gets restricted through CO---HO hydrogen bonding derived from MD is shown in (e). MD calculation was performed at 295 K for a time period of  $\sim 1$  ns.

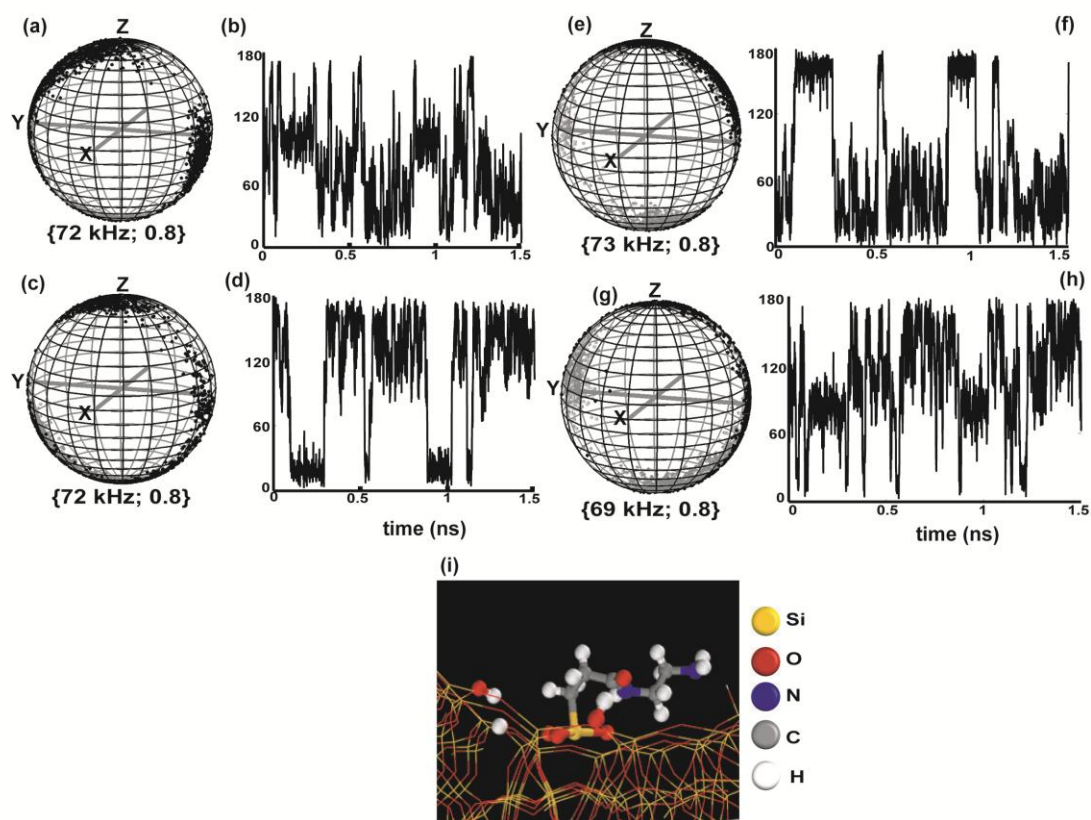

**Figure S5:** Distribution of the trajectory vectors drawn on a unit sphere along with the variation of the time dependent polar angle  $\theta$  for C<sub>1</sub>-D<sub>1,2</sub> and C<sub>2</sub>-D<sub>3,4</sub> derived from MD calculation are shown in (a-d) and (e-h) for the model where more than one hydroxyl is introduced. The configuration shown in (i) corresponds to the restricted mobility of the linker through CO---HO hydrogen bonding. MD calculation was performed at 295 K for a time period of  $\sim 1.5$  ns. Averaged quadrupolar parameters calculated are shown therein. Trajectories behind the sphere are drawn in grey.

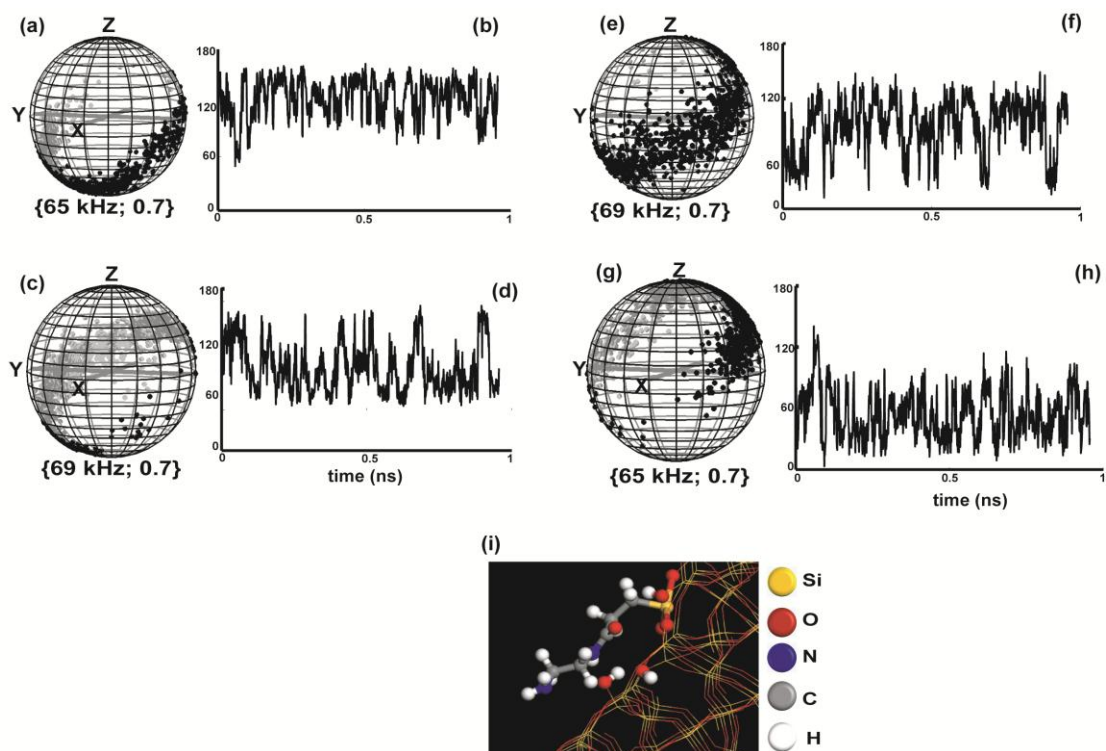

**Figure S6:** Distribution of the trajectory vectors drawn on a unit sphere along with the variation of the time dependent polar angle  $\theta$  for  $C_1-D_{1,2}$  and  $C_2-D_{3,4}$  derived from the MD calculation are shown in (a-d) and (e-h) for the model with more than one hydroxyl on the surface. Molecular conformation where the linker gets bound to the surface hydroxyl through NH---OH hydrogen bonding is shown in (i). MD calculation was performed at 295 K for a time period of  $\sim 1$  ns. Averaged quadrupolar parameters calculated are shown therein. Trajectories behind the sphere are drawn in grey.



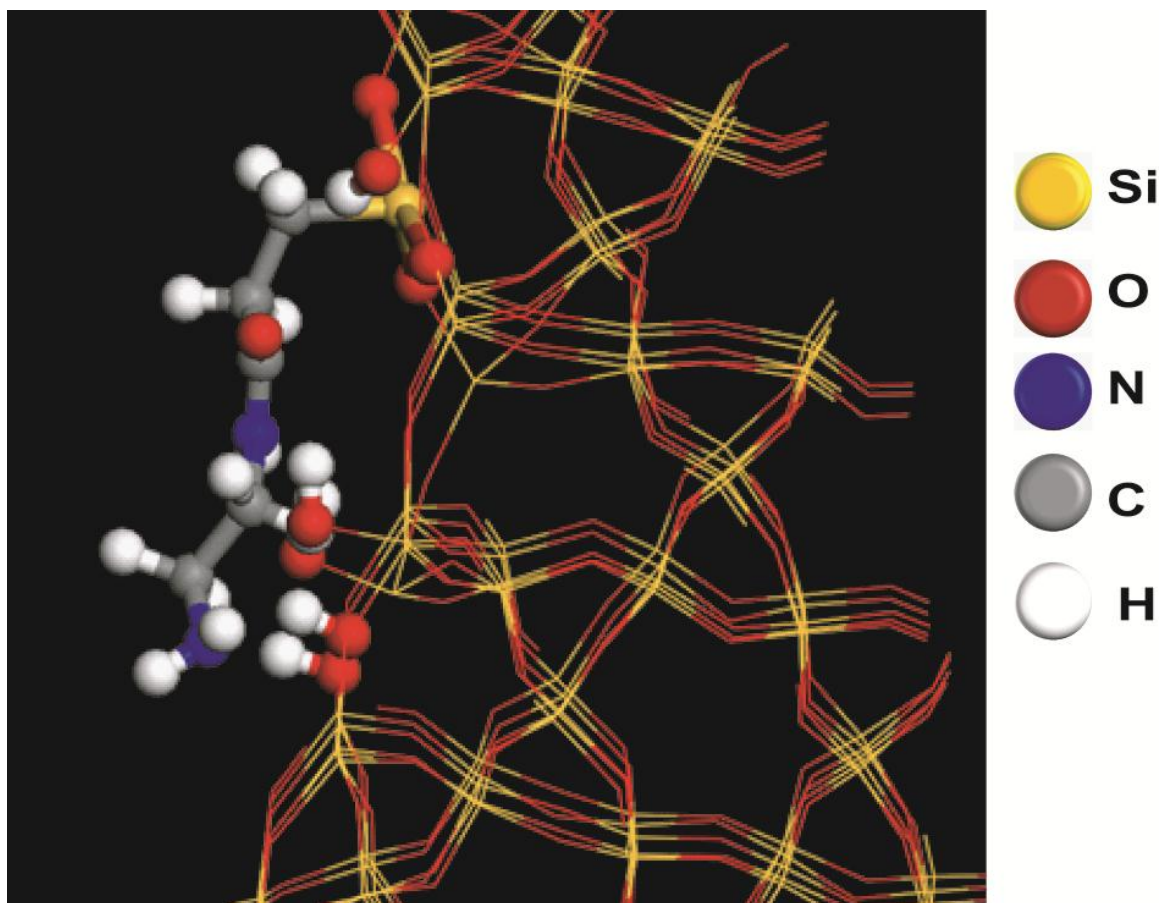

**Figure S7:** Molecular conformation where the linker gets bound to the surface through NH---OH and NH<sub>2</sub>---OH hydrogen bonding thereby resulting in static quadrupolar interaction parameters is shown. MD calculation was performed at 295 K for a time period of ~ 2 ns.
